# Supplementary material for: Lipid binding promotes the open conformation and tumor-suppressive activity of neurofibromin 2
Source: PubMed Central journal article supplement (PMC5889391; doi:10.1038/s41467-018-03648-4), 2018-04-06
Supplement: 41467_2018_3648_MOESM2_ESM.pdf [file 41467_2018_3648_MOESM2_ESM.pdf]

## **Description of Additional Supplementary Files**

File Name: Supplementary Data 1

Description: We provide our HDX dynamics data (absolute deuterium exchange) for the unbound and lipid-bound full-length neurofibromin 2 proteins in the form of all time points of the HDX.
